# Supplementary material
Source: PubMed Central journal article supplement (PMC3537813)
Supplement: supp_112017_inter-cusimano-1-at.pdf [file supp_112017_inter-cusimano-1-at.pdf]

## Appendix 1: Search strategy

### MEDLINE using OVID (from 1950)

|    |                                               |           |
|----|-----------------------------------------------|-----------|
| 1  | ice hockey.mp                                 | 561       |
| 2  | hockey.mp. or exp Hockey/                     | 1 484     |
| 3  | 1 or 2                                        | 1 484     |
| 4  | aggression.mp. or exp Aggression/             | 32 905    |
| 5  | exp Violence/ or violence.mp.                 | 69 791    |
| 6  | anger.mp. or exp Anger/                       | 10 852    |
| 7  | 4 or 5 or 6                                   | 106 368   |
| 8  | injury.mp. or exp "Wounds and Injuries"/      | 908 792   |
| 9  | injury prevention.mp.                         | 3 339     |
| 10 | intervention.mp. or exp Intervention Studies/ | 271 202   |
| 11 | prevention.mp.                                | 315 794   |
| 12 | prevention studies.mp.                        | 685       |
| 13 | reducing.mp.                                  | 205 942   |
| 14 | protection.mp.                                | 194 576   |
| 15 | exp Education/ or education.mp.               | 692 083   |
| 16 | 9 or 10 or 11 or 12 or 13 or 14 or 15         | 1 537 809 |
| 17 | 3 and 7 and 16                                | 12        |
| 18 | 3 and 7 and 8 and 16                          | 9         |

### MEDLINE using PubMed (from 1948)

|          |                                                                                                                                        |
|----------|----------------------------------------------------------------------------------------------------------------------------------------|
|          | hockey OR ice hockey                                                                                                                   |
| AND      | aggression OR violence OR anger                                                                                                        |
| AND      | injury OR wound                                                                                                                        |
| AND      | injury prevention OR intervention OR<br>intervention study OR prevention OR prevention<br>study OR reducing OR protection OR education |
| Results: | 17                                                                                                                                     |

**Embase using OVID (from 1980)**

|    |                                                            |           |
|----|------------------------------------------------------------|-----------|
| 1  | ice hockey.mp. or exp ice hockey/                          | 795       |
| 2  | hockey.mp.                                                 | 1 727     |
| 3  | 1 or 2                                                     | 1 727     |
| 4  | aggression.mp. or exp aggression/                          | 62 929    |
| 5  | exp violence/ or violence.mp.                              | 90 878    |
| 6  | exp anger/ or anger.mp.                                    | 15 772    |
| 7  | 4 or 5 or 6                                                | 148 129   |
| 8  | exp injury/ or injury.mp.                                  | 1 470 975 |
| 9  | injury prevention.mp.                                      | 4 456     |
| 10 | intervention.mp. or exp intervention study/                | 385 873   |
| 11 | exp prevention/ or prevention.mp. or exp prevention study/ | 1 141 254 |
| 12 | reducing.mp.                                               | 256 012   |
| 13 | protection.mp. or exp protection/                          | 374 065   |
| 14 | education.mp. or exp education/                            | 961 563   |
| 15 | 9 or 10 or 11 or 12 or 13 or 14                            | 2 626 174 |
| 16 | 3 and 7 and 15                                             | 17        |
| 17 | 3 and 7 and 8 and 15                                       | 14        |

**CINAHL (from 1981)**

|          |                      |
|----------|----------------------|
|          | MH "Hockey"          |
| AND      | MH "Hockey Injuries" |
| Results: | 2                    |

**Journals @ Scholars Portal (from 1987)**

|          |                                                                                                              |
|----------|--------------------------------------------------------------------------------------------------------------|
|          | hockey OR ice hockey                                                                                         |
| AND      | aggression OR violence OR anger                                                                              |
| AND      | injury                                                                                                       |
| AND      | injury prevention OR intervention OR prevention OR prevention studies OR reducing OR protection OR education |
| Results: | 125                                                                                                          |

**The Cochrane Library (from 1980)**

|          |                                                                                                              |
|----------|--------------------------------------------------------------------------------------------------------------|
|          | hockey OR ice hockey                                                                                         |
| AND      | aggression OR violence OR anger                                                                              |
| AND      | injury                                                                                                       |
| AND      | injury prevention OR intervention OR prevention OR prevention studies OR reducing OR protection OR education |
| Results: | 3                                                                                                            |

**PsycINFO (from 1987)**

|          |                                                                                                              |
|----------|--------------------------------------------------------------------------------------------------------------|
|          | hockey OR ice hockey                                                                                         |
| AND      | aggression OR violence OR anger                                                                              |
| AND      | injury                                                                                                       |
| AND      | injury prevention OR intervention OR prevention OR prevention studies OR reducing OR protection OR education |
| Results: | 2                                                                                                            |

**Web of Science (from 1976)**

|          |                                                                                                              |
|----------|--------------------------------------------------------------------------------------------------------------|
|          | hockey OR ice hockey                                                                                         |
| AND      | aggression OR violence OR anger                                                                              |
| AND      | injury                                                                                                       |
| AND      | injury prevention OR intervention OR prevention OR prevention studies OR reducing OR protection OR education |
| Results: | 22                                                                                                           |
