# Supplementary material
Source: PubMed Central journal article supplement (PMC3537813)
Supplement: supp_112017_inter-cusimano-3-at.pdf [file supp_112017_inter-cusimano-3-at.pdf]

| <b>Appendix 3: Downs and Black checklist<sup>1</sup> for the assessment of the methodologic quality of 18 studies included in the systematic review – Part 1 [8 studies<sup>2-9</sup>]</b> |                                                               |                                                                    |                                                               |                                                               |                                                               |                                                |                                                               |                                           |
|--------------------------------------------------------------------------------------------------------------------------------------------------------------------------------------------|---------------------------------------------------------------|--------------------------------------------------------------------|---------------------------------------------------------------|---------------------------------------------------------------|---------------------------------------------------------------|------------------------------------------------|---------------------------------------------------------------|-------------------------------------------|
| Checklist item                                                                                                                                                                             | Regnier et al.<br>1989 [2]                                    | Marcotte et al.<br>1993 [3]                                        | Roberts et al.<br>1996 [4]                                    | Watson et al.<br>1996 [5]                                     | Trudel et al.<br>2000 [6]                                     | Mattesi<br>2002 [7]                            | Cook et al.<br>2003 [8]                                       | Brunelle et al.<br>2005 [9]               |
| <b>Reporting</b>                                                                                                                                                                           |                                                               |                                                                    |                                                               |                                                               |                                                               |                                                |                                                               |                                           |
| Is the hypothesis/aim/objective of the study clearly described?                                                                                                                            | Yes                                                           | Yes                                                                | Yes                                                           | Yes                                                           | Yes                                                           | Yes                                            | Yes                                                           | Yes                                       |
| Are the main outcomes to be measured clearly described in the Introduction or Methods section?                                                                                             | Yes                                                           | Yes                                                                | Yes                                                           | Yes                                                           | Yes                                                           | Yes                                            | Yes                                                           | Yes                                       |
| Are the characteristics of the participants included in the study clearly described?                                                                                                       | Yes                                                           | Yes                                                                | Yes                                                           | Yes                                                           | Yes                                                           | Yes                                            | Yes                                                           | Yes                                       |
| Are the interventions of interest clearly described?                                                                                                                                       | Yes                                                           | Yes                                                                | Yes                                                           | Yes                                                           | Yes                                                           | Yes                                            | Yes                                                           | Yes                                       |
| Are the distributions of principal confounders in each group of subjects to be compared clearly described?                                                                                 | No – authors did not report any principal confounders         | No – authors did not report any principal confounders              | No                                                            | No                                                            | No – authors did not report any principal confounders         | No                                             | No                                                            | No                                        |
| Are the main findings of the study clearly described?                                                                                                                                      | Yes                                                           | Yes                                                                | Yes                                                           | Yes                                                           | Yes                                                           | Yes                                            | Yes                                                           | Yes                                       |
| Does the study provide estimates of the random variability in the data for the main outcomes?                                                                                              | No                                                            | No – study did not provide estimates of random variability of data | No                                                            | No                                                            | Yes                                                           | Yes                                            | Yes                                                           | Yes                                       |
| Have all important adverse events that may be a consequence of the intervention been reported?                                                                                             | No                                                            | No – authors did not report any adverse events                     | No – authors did not report any adverse events                | No – authors did not report any adverse events                | No – authors did not report any adverse events                | No – authors did not report any adverse events | No – authors did not report any adverse events                | No, incomplete self-report                |
| Have the characteristics of study participants lost to follow-up been described?                                                                                                           | No – the study does not report on any study participants lost | No – the study does not report on any study participants lost      | No – the study does not report on any study participants lost | No – the study does not report on any study participants lost | No – the study does not report on any study participants lost | Yes                                            | No – the study does not report on any study participants lost | No – 46% of the teams did not report data |
| Have actual probability values been reported (e.g. 0.035 rather than <0.05) for the main outcomes except where the probability value is less than 0.001?                                   | No                                                            | No                                                                 | No                                                            | No                                                            | Yes                                                           | No                                             | No, 95% confidence intervals are presented                    | Yes                                       |

*continued*

| <b>Appendix 3: Part 1 continued</b>                                                                                                       |                                       |                                      |                                                                                          |                               |                                                             |                                                                                                                  |                                                                                                                                                          |                                                                  |
|-------------------------------------------------------------------------------------------------------------------------------------------|---------------------------------------|--------------------------------------|------------------------------------------------------------------------------------------|-------------------------------|-------------------------------------------------------------|------------------------------------------------------------------------------------------------------------------|----------------------------------------------------------------------------------------------------------------------------------------------------------|------------------------------------------------------------------|
| Checklist item                                                                                                                            | Regnier et al. 1989 [2]               | Marcotte et al. 1993 [3]             | Roberts et al. 1996 [4]                                                                  | Watson et al. 1996 [5]        | Trudel et al. 2000 [6]                                      | Mattesi 2002 [7]                                                                                                 | Cook et al. 2003 [8]                                                                                                                                     | Brunelle et al. 2005 [9]                                         |
| <b>External validity</b>                                                                                                                  |                                       |                                      |                                                                                          |                               |                                                             |                                                                                                                  |                                                                                                                                                          |                                                                  |
| Were the subjects asked to participate in the study representative of the entire population from which they were recruited?               | Possibly, although not clearly stated | No, self selected                    | No, players were those who had not made a school team or were from schools without teams | Yes                           | Possibly, but only coaches enrolled                         | No – subjects chosen volunteered for study                                                                       | Probably not, since many coaches did not allow their teams to participate and so participating teams may be different from those who did not participate | No – teams from one specific region of the province were studied |
| Were those subjects who were prepared to participate representative of the entire population from which they were recruited?              | Probably                              | No                                   | No                                                                                       | Yes                           | Uncertain                                                   | No – subjects chosen volunteered for study                                                                       | Probably not, since many coaches did not allow their teams to participate and so participating teams may be different from those who did not participate | No – teams from one specific region of the province were studied |
| Were the staff, places, and facilities where the patients were treated, representative of the treatment the majority of patients receive? | Probably                              | Possibly                             | Yes                                                                                      | Yes                           | No – probably not                                           | Not clear, perhaps the voluntary nature of the participants indicates they are different in some way from others | Probably not, since many coaches did not allow their teams to participate and so participating teams may be different from those who did not participate | Yes                                                              |
| <b>Internal validity – bias</b>                                                                                                           |                                       |                                      |                                                                                          |                               |                                                             |                                                                                                                  |                                                                                                                                                          |                                                                  |
| Was an attempt made to blind study subjects to the intervention they have received?                                                       | No                                    | No – retrospective study used        | No blinding                                                                              | No – retrospective study used | No – authors did not state if there was an attempt to blind | No – authors did not state if there was an attempt to blind                                                      | No – no blinding                                                                                                                                         | No blinding                                                      |
| Was an attempt made to blind those measuring the main outcomes of the intervention?                                                       | No – authors did not report blinding  | No – authors did not report blinding | No blinding                                                                              | No – not blinded              | No – authors did not report blinding                        | No – authors did not report blinding                                                                             | No, but it is unlikely that referees were aware of the team assignment                                                                                   | No                                                               |
| If any of the results of the study were based on “Data dredging”, was this made clear?                                                    | Yes                                   | Yes                                  | Yes                                                                                      | Yes                           | Yes                                                         | Yes                                                                                                              | Yes                                                                                                                                                      | Yes                                                              |

*continued*

| <b>Appendix 3: Part 1 continued</b>                                                                                                                                                                                       |                           |                                |                                                                                                               |                                                                    |                                                                                |                                                                                     |                                                                                                       |                           |
|---------------------------------------------------------------------------------------------------------------------------------------------------------------------------------------------------------------------------|---------------------------|--------------------------------|---------------------------------------------------------------------------------------------------------------|--------------------------------------------------------------------|--------------------------------------------------------------------------------|-------------------------------------------------------------------------------------|-------------------------------------------------------------------------------------------------------|---------------------------|
| Checklist item                                                                                                                                                                                                            | Regnier et al. 1989 [2]   | Marcotte et al. 1993 [3]       | Roberts et al. 1996 [4]                                                                                       | Watson et al. 1996 [5]                                             | Trudel et al. 2000 [6]                                                         | Mattesi 2002 [7]                                                                    | Cook et al. 2003 [8]                                                                                  | Brunelle et al. 2005 [9]  |
| In trials and cohort studies, do the analyses adjust for different lengths of follow-up of patients, or in case-control studies, is the time period between the intervention and outcome the same for cases and controls? | Yes                       | Yes                            | Teams who proceeded to the regular part of the tournament were different than those who did not               | Yes                                                                | Yes                                                                            | Yes                                                                                 | Yes                                                                                                   | Yes                       |
| Were the statistical tests used to assess the main outcomes appropriate?                                                                                                                                                  | Yes                       | NA – no statistical tests used | Yes                                                                                                           | Yes, more possible                                                 | Yes                                                                            | Yes                                                                                 | Yes                                                                                                   | Yes                       |
| Was compliance with the intervention/s reliable?                                                                                                                                                                          | Probably                  | Probably                       | Probably                                                                                                      | Yes, probably although referee behaviour not specifically observed | N/A – potential contamination of data due to possible lack of coach compliance | Yes                                                                                 | Yes, but not all players participated                                                                 | Not reported              |
| Were the main outcome measures used accurate (valid and reliable)?                                                                                                                                                        | Yes                       | Yes                            | Yes                                                                                                           | Yes                                                                | Yes                                                                            | Yes                                                                                 | Yes                                                                                                   | Yes                       |
| <b>Internal validity – confounding</b>                                                                                                                                                                                    |                           |                                |                                                                                                               |                                                                    |                                                                                |                                                                                     |                                                                                                       |                           |
| Were the participants in different intervention groups (trials and cohort studies) or were the cases and controls (case-control studies) recruited from the same population?                                              | Yes                       | Yes                            | Yes, but probably differed in some systematic way since only certain teams proceeded to regular rules section | Yes, but at different times                                        | No                                                                             | Yes                                                                                 | Yes, but both groups may have differed from the whole population since they volunteered for the study | Yes                       |
| Were study subjects in different intervention groups (trials and cohort studies) or were the cases and controls (case-control studies) recruited over the same period of time?                                            | Yes                       | Yes                            | No, sequential recruitment                                                                                    | No                                                                 | Yes                                                                            | Yes                                                                                 | Yes                                                                                                   | Yes                       |
| Were study subjects randomized to intervention groups?                                                                                                                                                                    | No – study not randomized | No – teams not randomized      | No – teams not randomized                                                                                     | No – not randomized. Before-after assessment                       | No – not randomized                                                            | No – study did not state whether randomization occurred; voluntary group assignment | Yes                                                                                                   | No – teams not randomized |
| Was the randomized intervention assignment concealed from both patients and health care staff until recruitment was complete and irrevocable?                                                                             | No – study not randomized | No – not randomized            | No – not randomized                                                                                           | No – study not randomized                                          | No – not randomized                                                            | No – voluntary group assignment                                                     | No                                                                                                    | Not randomized            |

*continued*

| <b>Appendix 3: Part 1 continued</b>                                                                                                                           |                                      |                                      |                                                                                 |                                                        |                                      |                  |                                      |                                              |
|---------------------------------------------------------------------------------------------------------------------------------------------------------------|--------------------------------------|--------------------------------------|---------------------------------------------------------------------------------|--------------------------------------------------------|--------------------------------------|------------------|--------------------------------------|----------------------------------------------|
| Checklist item                                                                                                                                                | Regnier et al. 1989 [2]              | Marcotte et al. 1993 [3]             | Roberts et al. 1996 [4]                                                         | Watson et al. 1996 [5]                                 | Trudel et al. 2000 [6]               | Mattesi 2002 [7] | Cook et al. 2003 [8]                 | Brunelle et al. 2005 [9]                     |
| Was there adequate adjustment for confounding in the analyses from which the main findings were drawn?                                                        | No                                   | No                                   | No                                                                              | No                                                     | No                                   | No               | No                                   | No                                           |
| Were losses of patients to follow-up taken into account?                                                                                                      | No – study did not report any losses | No – study did not report any losses | No – study did not report any losses                                            | No – study did not report any losses                   | No – study did not report any losses | Yes              | No – study did not report any losses | No                                           |
| <b>Power</b>                                                                                                                                                  |                                      |                                      |                                                                                 |                                                        |                                      |                  |                                      |                                              |
| Did the study have sufficient power to detect a clinically important effect where the probability value for a difference being due to chance is less than 5%? | Adequate (n=405, n=263)              | Adequate (n=329, n=338)              | Inadequate, since only 29 total injuries and 11 notable injuries in 273 players | Adequate (n=653 injury records, n=389 penalty records) | Inadequate (n=28)                    | Inadequate (n=3) | Inadequate (n=30, n=45)              | Inadequate, only 76 injured players analyzed |

*continued*

| <b>Appendix 3:</b> Downs and Black checklist <sup>1</sup> for the assessment of the methodologic quality of 18 studies included in systematic review – Part 2 [10 studies <sup>10-19</sup> ] |                                                                                                                                                 |                                                       |                                                                               |                                                                                                                        |                                                       |                                                       |                        |                                                    |                                                       |                                                       |
|----------------------------------------------------------------------------------------------------------------------------------------------------------------------------------------------|-------------------------------------------------------------------------------------------------------------------------------------------------|-------------------------------------------------------|-------------------------------------------------------------------------------|------------------------------------------------------------------------------------------------------------------------|-------------------------------------------------------|-------------------------------------------------------|------------------------|----------------------------------------------------|-------------------------------------------------------|-------------------------------------------------------|
| Checklist item                                                                                                                                                                               | Macpherson et al. 2006 [10]                                                                                                                     | Hagel et al. 2006 [11]                                | Gee et al. 2007 [12]                                                          | Lauer 2009 [13]                                                                                                        | Smith et al. 2009 [14]                                | Emery et al. 2009 [15]                                | Emery et al. 2010 [16] | Kukaswadia et al. 2010 [17]                        | Cusimano et al. 2011 [18]                             | Emery et al. 2011 [19]                                |
| <b>Reporting</b>                                                                                                                                                                             |                                                                                                                                                 |                                                       |                                                                               |                                                                                                                        |                                                       |                                                       |                        |                                                    |                                                       |                                                       |
| Is the hypothesis/aim/objective of the study clearly described?                                                                                                                              | Yes                                                                                                                                             | Yes                                                   | Yes                                                                           | Yes                                                                                                                    | Yes                                                   | Yes                                                   | Yes                    | Yes                                                | Yes                                                   | Yes                                                   |
| Are the main outcomes to be measured clearly described in the Introduction or Methods section?                                                                                               | Yes                                                                                                                                             | Yes                                                   | Yes                                                                           | Yes                                                                                                                    | Yes                                                   | Yes                                                   | Yes                    | Yes                                                | Yes                                                   | Yes                                                   |
| Are the characteristics of the participants included in the study clearly described?                                                                                                         | Yes                                                                                                                                             | Yes                                                   | Yes, indirectly                                                               | Yes                                                                                                                    | Yes                                                   | Yes                                                   | Yes                    | Yes                                                | Yes                                                   | Yes                                                   |
| Are the interventions of interest clearly described?                                                                                                                                         | Yes                                                                                                                                             | Yes                                                   | No, not clear if timing was with event or with the timing of the legal charge | Yes                                                                                                                    | Yes                                                   | Yes                                                   | Yes                    | Yes                                                | Yes                                                   | Yes                                                   |
| Are the distributions of principal confounders in each group of subjects to be compared clearly described?                                                                                   | Partially                                                                                                                                       | No – authors did not report any principal confounders | No – authors did not report any principal confounders                         | Yes                                                                                                                    | No – authors did not report any principal confounders | No – authors did not report any principal confounders | Yes                    | Partially                                          | No – authors did not report any principal confounders | No – authors did not report any principal confounders |
| Are the main findings of the study clearly described?                                                                                                                                        | Yes                                                                                                                                             | Yes                                                   | Yes                                                                           | Yes                                                                                                                    | Yes                                                   | Yes                                                   | Yes                    | Yes                                                | Yes                                                   | Yes                                                   |
| Does the study provide estimates of the random variability in the data for the main outcomes?                                                                                                | Yes                                                                                                                                             | Yes                                                   | Yes                                                                           | Yes                                                                                                                    | Yes                                                   | Yes                                                   | Yes                    | Yes                                                | Yes                                                   | Yes                                                   |
| Have all important adverse events that may be a consequence of the intervention been reported?                                                                                               | No – authors did not report other adverse events such as decreased numbers of players making it to varsity scholarships or professional leagues | No – authors did not report other adverse events      | No, for example, injuries are not described                                   | Likely not – authors did not report any adverse events                                                                 | No – authors did not report other adverse events      | No – authors did not report other adverse events      | Yes                    | No – authors did not report other adverse events   | No – authors did not report other adverse events      | No – authors did not report other adverse events      |
| Have the characteristics of study participants lost to follow-up been described?                                                                                                             | No – study did not report on any participants lost                                                                                              | No – study did not report on any participants lost    | No – study did not report on any participants lost                            | No – study did not report on any participants lost; one was considered unsuitable for the program and was not included | No – study did not report on any participants lost    | No – study did not report on any participants lost    | Yes                    | No – study did not report on any participants lost | No – study did not report on any participants lost    | No – study did not report on any participants lost    |

*continued*

| <b>Appendix 3: Part 2 continued</b>                                                                                                                      |                                                                                                                 |                                                             |                                                                                                                                                         |                                                                                                   |                                                                                      |                                                                                                                                                                |                                                             |                                                 |                                                           |                                                 |
|----------------------------------------------------------------------------------------------------------------------------------------------------------|-----------------------------------------------------------------------------------------------------------------|-------------------------------------------------------------|---------------------------------------------------------------------------------------------------------------------------------------------------------|---------------------------------------------------------------------------------------------------|--------------------------------------------------------------------------------------|----------------------------------------------------------------------------------------------------------------------------------------------------------------|-------------------------------------------------------------|-------------------------------------------------|-----------------------------------------------------------|-------------------------------------------------|
| Checklist item                                                                                                                                           | Macpherson et al. 2006 [10]                                                                                     | Hagel et al. 2006 [11]                                      | Gee et al. 2007 [12]                                                                                                                                    | Lauer 2009 [13]                                                                                   | Smith et al. 2009 [14]                                                               | Emery et al. 2009 [15]                                                                                                                                         | Emery et al. 2010 [16]                                      | Kukaswadia et al. 2010 [17]                     | Cusimano et al. 2011 [18]                                 | Emery et al. 2011 [19]                          |
| Have actual probability values been reported (e.g. 0.035 rather than <0.05) for the main outcomes except where the probability value is less than 0.001? | No, but 95% confidence intervals are reported                                                                   | No, but 95% confidence intervals are reported               | Yes                                                                                                                                                     | No                                                                                                | No                                                                                   | Yes                                                                                                                                                            | No, but 95% confidence intervals are reported               | No, but 95% confidence intervals are reported   | Yes                                                       | No, but 95% confidence intervals are reported   |
| <b>External validity</b>                                                                                                                                 |                                                                                                                 |                                                             |                                                                                                                                                         |                                                                                                   |                                                                                      |                                                                                                                                                                |                                                             |                                                 |                                                           |                                                 |
| Were the subjects asked to participate in the study representative of the entire population from which they were recruited?                              | Yes, probably, since it is unlikely that injured players differ significantly from jurisdiction to jurisdiction | Yes, probably; however, players were from a single province | Yes – only NHL players participated in study, although it is conceivable that players were called from or sent to non-NHL teams during the study period | No – three male youth ice hockey players were identified as aggressive players for the study      | Probably, but players in Fair Play may differ from those not in fair play            | Yes                                                                                                                                                            | Yes                                                         | Yes                                             | Yes, probably, however players are from a single province | Yes                                             |
| Were those subjects who were prepared to participate representative of the entire population from which they were recruited?                             | Yes, probably                                                                                                   | Yes                                                         | Yes, probably                                                                                                                                           | No – only three male youth ice hockey players were identified as aggressive players for the study | Yes, probably                                                                        | No – low levels of participation in bodychecking cohort may have introduced selection bias                                                                     | Yes                                                         | Yes, probably                                   | Yes, probably                                             | Yes, probably                                   |
| Were the staff, places, and facilities where the patients were treated, representative of the treatment the majority of patients receive?                | Yes                                                                                                             | Yes                                                         | Yes                                                                                                                                                     | Yes                                                                                               | Yes, probably                                                                        | No – two teams in bodychecking league had access to additional medical professionals that may have resulted in greater accuracy of injury detail and follow-up | Yes                                                         | Yes                                             | Yes                                                       | Yes                                             |
| <b>Internal validity – bias</b>                                                                                                                          |                                                                                                                 |                                                             |                                                                                                                                                         |                                                                                                   |                                                                                      |                                                                                                                                                                |                                                             |                                                 |                                                           |                                                 |
| Was an attempt made to blind study subjects to the intervention they have received?                                                                      | No – not applicable, retrospective study design                                                                 | No – not applicable, retrospective study design             | No – not applicable, retrospective study design                                                                                                         | No – not blinded                                                                                  | No – not a randomized study however subjects not aware they would be part of a study | No – authors did not state if there was an attempt to blind                                                                                                    | No – authors did not state if there was an attempt to blind | No – not applicable, retrospective study design | No – not applicable, retrospective study design           | No – not applicable, retrospective study design |
| Was an attempt made to blind those measuring the main outcomes of the intervention?                                                                      | No – not applicable                                                                                             | No – not applicable                                         | No – all players likely aware of legal charge                                                                                                           | No                                                                                                | No – authors did not blind                                                           | Yes                                                                                                                                                            | No – authors did not blind                                  | No – not applicable                             | No – not applicable                                       | No – not applicable                             |

*continued*

| <b>Appendix 3: Part 2 continued</b>                                                                                                                                                                                       |                                                                                   |                        |                                                                                                      |                                           |                                           |                        |                                    |                             |                           |                        |
|---------------------------------------------------------------------------------------------------------------------------------------------------------------------------------------------------------------------------|-----------------------------------------------------------------------------------|------------------------|------------------------------------------------------------------------------------------------------|-------------------------------------------|-------------------------------------------|------------------------|------------------------------------|-----------------------------|---------------------------|------------------------|
| Checklist item                                                                                                                                                                                                            | Macpherson et al. 2006 [10]                                                       | Hagel et al. 2006 [11] | Gee et al. 2007 [12]                                                                                 | Lauer 2009 [13]                           | Smith et al. 2009 [14]                    | Emery et al. 2009 [15] | Emery et al. 2010 [16]             | Kukaswadia et al. 2010 [17] | Cusimano et al. 2011 [18] | Emery et al. 2011 [19] |
| If any of the results of the study were based on "Data dredging", was this made clear?                                                                                                                                    | Yes                                                                               | Yes                    | Yes                                                                                                  | Yes                                       | Yes                                       | Yes                    | Yes                                | Yes                         | Yes                       | Yes                    |
| In trials and cohort studies, do the analyses adjust for different lengths of follow-up of patients, or in case-control studies, is the time period between the intervention and outcome the same for cases and controls? | Yes                                                                               | Yes                    | Yes, likely, although not stated specifically                                                        | Yes                                       | Yes                                       | Yes                    | Yes                                | Yes                         | Yes                       | Yes                    |
| Were the statistical tests used to assess the main outcomes appropriate                                                                                                                                                   | Yes                                                                               | Yes                    | Yes                                                                                                  | NA – there were no statistical tests used | NA – there were no statistical tests used | Yes                    | Yes                                | Yes                         | Yes                       | Yes                    |
| Was compliance with the intervention/s reliable?                                                                                                                                                                          | Yes, probably, since rules were likely implemented uniformly across the provinces | Yes                    | Yes                                                                                                  | Yes                                       | Yes, likely                               | Yes                    | Yes                                | Yes                         | Yes, likely               | Yes                    |
| Were the main outcome measures used accurate (valid and reliable)?                                                                                                                                                        | Yes                                                                               | Yes                    | Yes, probably, although it is possible that referees changed their behaviour as well after the event | Yes                                       | Yes, probably rules applied equally       | Yes                    | Yes                                | Yes                         | Yes                       | Yes                    |
| <b>Internal validity – confounding</b>                                                                                                                                                                                    |                                                                                   |                        |                                                                                                      |                                           |                                           |                        |                                    |                             |                           |                        |
| Were the participants in different intervention groups (trials and cohort studies) or were the cases and controls (case-control studies) recruited from the same population?                                              | Yes                                                                               | Yes                    | Yes                                                                                                  | No controls                               | Yes                                       | Yes                    | Yes, different provinces in Canada | Not clear                   | Yes                       | Yes                    |
| Were study subjects in different intervention groups (trials and cohort studies) or were the cases and controls (case-control studies) recruited over the same period of time?                                            | Yes                                                                               | Yes                    | No, but likely insignificant differences                                                             | Yes                                       | Yes                                       | Yes                    | Yes                                | Yes                         | Yes                       | Yes                    |

continued

| <b>Appendix 3: Part 2 continued</b>                                                                                                                           |                                                   |                                      |                                      |                                             |                                                      |                                      |                           |                                                                                     |                                      |                                      |
|---------------------------------------------------------------------------------------------------------------------------------------------------------------|---------------------------------------------------|--------------------------------------|--------------------------------------|---------------------------------------------|------------------------------------------------------|--------------------------------------|---------------------------|-------------------------------------------------------------------------------------|--------------------------------------|--------------------------------------|
| Checklist item                                                                                                                                                | Macpherson et al. 2006 [10]                       | Hagel et al. 2006 [11]               | Gee et al. 2007 [12]                 | Lauer 2009 [13]                             | Smith et al. 2009 [14]                               | Emery et al. 2009 [15]               | Emery et al. 2010 [16]    | Kukaswadia et al. 2010 [17]                                                         | Cusimano et al. 2011 [18]            | Emery et al. 2011 [19]               |
| Were study subjects randomized to intervention groups?                                                                                                        | No – cohorts were children in different provinces | No – not randomized                  | NA – no randomization                | No – subjects not randomized                | No – subjects not randomized                         | No – not randomized                  | No – not randomized       | No – cohort study                                                                   | No – not randomized                  | No – not randomized                  |
| Was the randomized intervention assignment concealed from both patients and health care staff until recruitment was complete and irrevocable?                 | No – study not randomized                         | No – study not randomized            | No – not randomized nor concealed    | No – study not randomized                   | No – study did not state whether concealing occurred | No – study not randomized            | No – study not randomized | No – not applicable                                                                 | No – study not randomized            | No – study not randomized            |
| Was there adequate adjustment for confounding in the analyses from which the main findings were drawn?                                                        | No                                                | Yes                                  | No, referee behaviour not assessed   | NA – no quantitative analysis was performed | No                                                   | Yes                                  | Yes                       | No                                                                                  | No                                   | No                                   |
| Were losses of patients to follow-up taken into account?                                                                                                      | No – study did not report any losses              | No – study did not report any losses | No – study did not report any losses | No – study did not report any losses        | No – study did not report any losses                 | No – study did not report any losses | Yes                       | No – study did not report any losses                                                | No – study did not report any losses | No – study did not report any losses |
| <b>Power</b>                                                                                                                                                  |                                                   |                                      |                                      |                                             |                                                      |                                      |                           |                                                                                     |                                      |                                      |
| Did the study have sufficient power to detect a clinically important effect where the probability value for a difference being due to chance is less than 5%? | Adequate (n=4736)                                 | Adequate (n=233)                     | Adequate                             | No (n=3)                                    | Adequate (large sample size)                         | Adequate (n=283)                     | Adequate (n=2154)         | Adequate (n=2708); however, the numbers of injury per year were substantially fewer | Adequate (n=8552)                    | Adequate (n=1971)                    |
| Note: NA = not applicable, NHL = National Hockey League. Citations of the included studies appear on the next page.                                           |                                                   |                                      |                                      |                                             |                                                      |                                      |                           |                                                                                     |                                      |                                      |

*continued*



## References

1. Regnier G, Boileau R, Marcotte G, et al. Effects of body checking in the Pee-Wee (12 and 13) years old division in the province of Quebec. In: Castaldi CR, Hoerner EF, editors. *Safety in ice hockey*. West Conshohocken (PA): American Society for Testing and Materials; 1989. p. 84-103.
2. Marcotte G, Simard D. Fair-play: an approach to hockey for the 1990s. In: Castaldi CR, Bishop PJ, Hoerner EF, editors. *Safety in ice hockey: second volume*. West Conshohocken (PA): American Society for Testing and Materials; 1993. p. 103-7.
3. Roberts WO, Brust JD, Leonard B, et al. Fair-play rules and injury reduction in ice hockey. *Arch Pediatr Adolesc Med* 1996;150:140-5.
4. Watson RC, Singer CD, Sproule JR. Checking from behind in ice hockey: a study of injury and penalty data in the Ontario University Athletic Association Hockey League. *Clin J Sport Med* 1996;6:108-11.
5. Trudel P, Bernard D, Boileau R, et al. Effects of an intervention strategy on body checking, penalties, and injuries in ice hockey. In: Ashare AB, editor. *Safety in ice hockey: third volume*. West Conshohocken (PA): American Society for Testing and Materials; 2000. p. 237-49.
6. Mattesi M. *The effects of an aggression-management training intervention program on controlling ice hockey player penalty minutes*. Morgantown (WV): West Virginia University; 2002.
7. Cook DJ, Cusimano MD, Tator CH, et al. Evaluation of the ThinkFirst Canada, Smart Hockey, brain and spinal cord injury prevention video. *Inj Prev* 2003;9:361-6.
8. Brunelle JP, Goulet C, Arguin H. Promoting respect for the rules and injury prevention in ice hockey: evaluation of the fair-play program. *J Sci Med Sport* 2005;8:294-304.
9. Macpherson A, Rothman L, Howard A. Body-checking rules and childhood injuries in ice hockey. *Pediatrics* 2006;117:e143-7.
10. Hagel BE, Marko J, Dryden D, et al. Effect of bodychecking on injury rates among minor ice hockey players. *CMAJ* 2006;175:155-60.
11. Gee CJ, Potwarka L. The impact of introducing legal punishment on the frequency of aggressive behaviour in professional ice hockey: using the Todd Bertuzzi incident as an ecological case study. *Online J Sports Psychol* 2007;9:15-30.
12. Lauer L, Paiement C. The Playing Tough and Clean Hockey Program. *Sport Psychol* 2009;23:543-61.
13. Smith AM, Jorgenson M, Sorenson MC, et al. Hockey Education Program (HEP): a statewide measure of fair play, skill development, and coaching excellence. *J ASTM Int* 2009;6:1-14.
14. Emery CA, McKay CD, Campbell TS, et al. Examining attitudes toward body checking, levels of emotional empathy and levels of aggression in body checking and non-body checking youth hockey leagues. *Clin J Sport Med* 2009;19:207-15.
15. Emery CA, Kang J, Shrier I, et al. Risk of injury associated with body checking among youth ice hockey players. *JAMA* 2010;303:2265-72.
16. Kukaswadia A, Warsh J, Mihalik JP, et al. Effects of changing body-checking rules on rates of injury in minor hockey. *Pediatrics* 2010;125:735-41.
17. Cusimano MD, Taback NA, McFaull SR, et al. Effect of bodychecking on rate of injuries among minor hockey players. *Open Med* 2011;5:e57-64.
18. Emery C, Kang J, Shrier I, et al. Risk of injury associated with bodychecking experience among youth hockey players. *CMAJ* 2011;183:1249-56.
